# Supplementary material for: Systemic treatment of hormone receptor positive, human epidermal growth factor 2 negative metastatic breast cancer: retrospective analysis from Leeds Cancer Centre
Source: PubMed Central journal article supplement (PMC6975018; doi:10.1186/s12885-020-6527-y), 2020-01-21

# Supplementary 1 STROBE flow chart for study inclusion

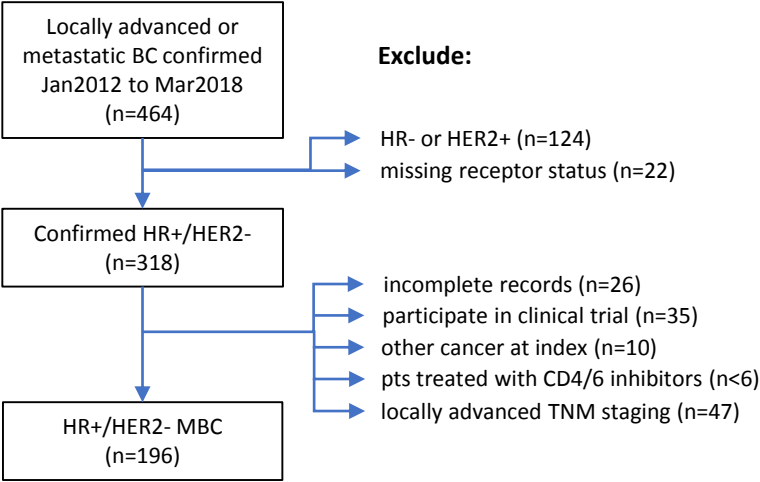

Supplement: 12885_2020_6527_MOESM1_ESM.pdf [file 12885_2020_6527_MOESM1_ESM.pdf]
