# Supplementary material for: Systemic treatment of hormone receptor positive, human epidermal growth factor 2 negative metastatic breast cancer: retrospective analysis from Leeds Cancer Centre
Source: PubMed Central journal article supplement (PMC6975018; doi:10.1186/s12885-020-6527-y), 2020-01-21
Supplement: 12885_2020_6527_MOESM2_ESM.pdf [file 12885_2020_6527_MOESM2_ESM.pdf]

**Supplementary 2** The three most common sequence of regimens received by patients (n=185) in each major treatment sequence category, showing the total number of patients in each sequence category and the proportion of all treated patients (small number masking in operation).

| <b>Sequence</b>                        | <b>Agents(s)</b>                                                                                                             |
|----------------------------------------|------------------------------------------------------------------------------------------------------------------------------|
| Endo<br>(n=51, 27.6%)                  | Letrozole<br>Anastrozole<br>Exemestane                                                                                       |
| Endo - Endo - Endo<br>(n=19, 10.3%)    | Letrozole - Exemestane – Tamoxifen<br>Letrozole - Fulvestrant - Tamoxifen<br>Exemestane - Tamoxifen - Letrozole              |
| Endo - Endo<br>(n=17, 9.2%)            | Letrozole – Exemestane<br>Letrozole – Tamoxifen<br>Anastrozole – Exemestane                                                  |
| Endo - Endo - Chemo<br>(n=8, 4.3%)     | Exemestane - Fulvestrant - Capecitabine<br>Letrozole - Exemestane - Capecitabine<br>Anastrozole - Fulvestrant - Capecitabine |
| Chemo<br>(n=7, 3.8%)                   | Paclitaxel<br>EC                                                                                                             |
| Endo - Endo/Targ - Endo<br>(n=7, 3.8%) | Letrozole - Evero/Exem – Tamoxifen<br>Letrozole - Evero/Exem - Fulvestrant<br>Anastrozole - Evero/Exem - Fulvestrant         |
| Chemo - Chemo<br>(n=6, 3.2%)           | Carboplatin – Capecitabine<br>Paclitaxel – Carboplatin<br>EC – Paclitaxel                                                    |
| Endo - Chemo - Chemo<br>(n<6)          | Exemestane - Capecitabine - Paclitaxel<br>Letrozole - Paclitaxel - Capecitabine<br>Anastrozole - Capecitabine - Paclitaxel   |
| Endo - Endo/Targ<br>(n<6)              | Anastrozole - Evero/Exem<br>Letrozole - Evero/Exem<br>Tamoxifen - Evero/Exem                                                 |
| Chemo - Endo - Endo<br>(n<6)           | EC - Letrozole - Exemestane<br>Capecitabine - Tamoxifen - Fulvestrant<br>Paclitaxel - Letrozole - Anastrozole                |
| Chemo - Endo - Chemo<br>(n<6)          | EC - Letrozole - Paclitaxel<br>Capecitabine - Tamoxifen - Paclitaxel<br>Carboplatin - Letrozole - Paclitaxel                 |
| Chemo - Chemo - Endo<br>(n<6)          | EC- Docetaxel - Tamoxifen<br>Carboplatin - Paclitaxel - Anastrozole<br>Docetaxel - Capecitabine - Fulvestrant                |
